# Supplementary material for: Relating structural disorder and melting in complex mixed ligand zeolitic imidazolate framework glasses
Source: Royal Society of Chemistry journal article supplement (doi:10.1039/c9dt03559a), 2019-12-12
Supplement: c9dt03559a1.pdf [file c9dt03559a1.pdf]

## Supporting Information

### Relating Structural Disorder and Melting in Complex Mixed Ligand Zeolitic Imidazolate Framework Glasses

María Laura Ríos Gómez,<sup>a,b</sup> Giulio Isacco Lampronti,<sup>c</sup> Yongjian Yang,<sup>d</sup> John C. Mauro<sup>d</sup> and Thomas Douglas Bennett<sup>\*a</sup>

<sup>a</sup> Department of Materials Science and Metallurgy, University of Cambridge, UK.

<sup>b</sup> Departamento de Polímeros, Instituto de Investigaciones en Materiales, Universidad Nacional Autónoma de México, Ciudad de México 04510, México.

<sup>c</sup> Department of Earth Sciences, University of Cambridge, UK.

<sup>d</sup> Department of Materials Science and Engineering, The Pennsylvania State University, University Park, Pennsylvania 16802, USA.

## 1. X-ray Diffraction

Two members of the ZIF family: ZIF-62 [ $\text{Zn}(\text{Im})_{1.75}(\text{blm})_{0.25}$ ] and TIF-4 [ $\text{Zn}(\text{Im})_{1.5}(\text{mbIm})_{0.5}$ ], have been previously studied because of their glass forming abilities. They are isomorphous (space group *Pbca*) with a cag network topology. Their unit cell parameters and volumes are similar:  $a = 15.6620(14)$  Å,  $b = 15.6621(13)$  Å,  $c = 18.2073(19)$  Å,  $V = 4466.2(7)$  Å<sup>3</sup> for ZIF-62; and  $a = 15.6251(9)$  Å,  $b = 16.3217(9)$  Å,  $c = 18.1244(10)$  Å,  $V = 4622.2(4)$  Å<sup>3</sup> for TIF-4. They both undergo a single melting event at  $T_m = 710$  K and  $T_m = 740$  K respectively, before decomposition at around 875 K. The glasses formed by melt quenching at  $T_m$ , exhibit a  $T_g$  at 591 K and 616 K respectively. These previous results support the viability of obtaining a system with three linkers (Im, blm and mbIm), able to crystallize in *Pbca* space group and able to form melt-quenched glasses.

### 1.1. Powder diffraction

All powder samples crystallized in the orthorhombic crystal system, and the reflections were consistent with space group *Pbca* (# 61). Pawley refinements were conducted using the software TOPAS (version 5). Cell parameters were determined from a single phase designation, using the ones reported for ZIF-62 by Yaghi<sup>1</sup> (CSD No. 671070) as a starting point. All 3 cell parameters were allowed to vary until convergence. Results are detailed in Table S1.

**Table S1:** Pawley refinement of powder samples: cell parameters and refinement parameters.

| Samples   | $a$ (Å)   | $b$ (Å)   | $c$ (Å)   | $R_{wp}$ | Goof   |
|-----------|-----------|-----------|-----------|----------|--------|
| ZIF-UC-1a | 15.448(3) | 15.534(3) | 18.023(3) | 7.0180   | 1.3429 |
| ZIF-UC-1b | 15.427(6) | 15.530(6) | 17.980(6) | 6.2389   | 1.1778 |
| ZIF-UC-1c | 15.413(4) | 15.527(4) | 18.010(4) | 6.2224   | 1.2176 |
| ZIF-UC-1d | 15.424(6) | 15.542(6) | 17.946(7) | 6.2736   | 1.1840 |
| ZIF-UC-1e | 15.397(4) | 15.544(4) | 18.023(4) | 6.3727   | 1.2585 |

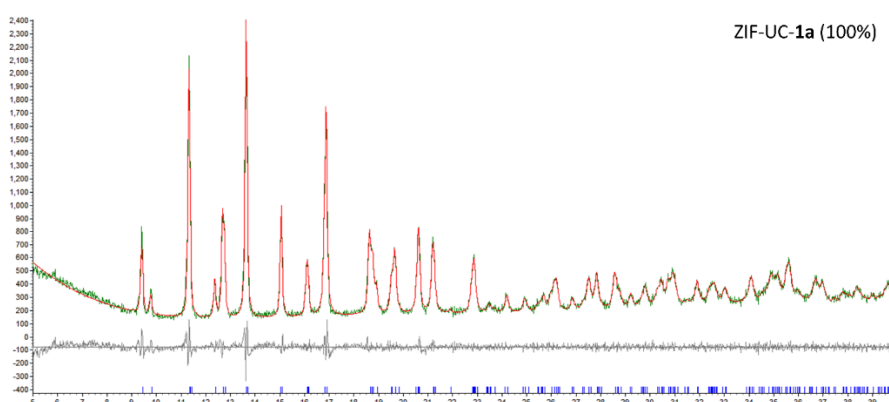

Figure S1. Experimental X-ray diffraction pattern of ZIF-UC-1a powder sample (green). Pawley refinement using Topas (red).

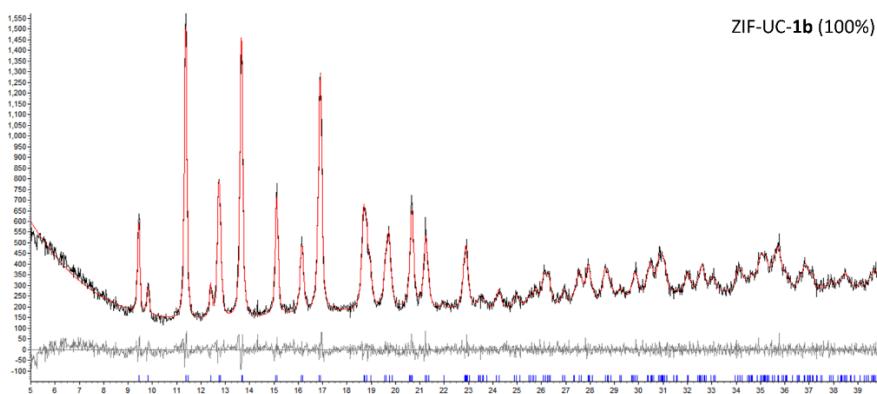

Figure S2. Experimental X-ray diffraction pattern of ZIF-UC-1b powder sample (black). Pawley refinement using Topas (red).

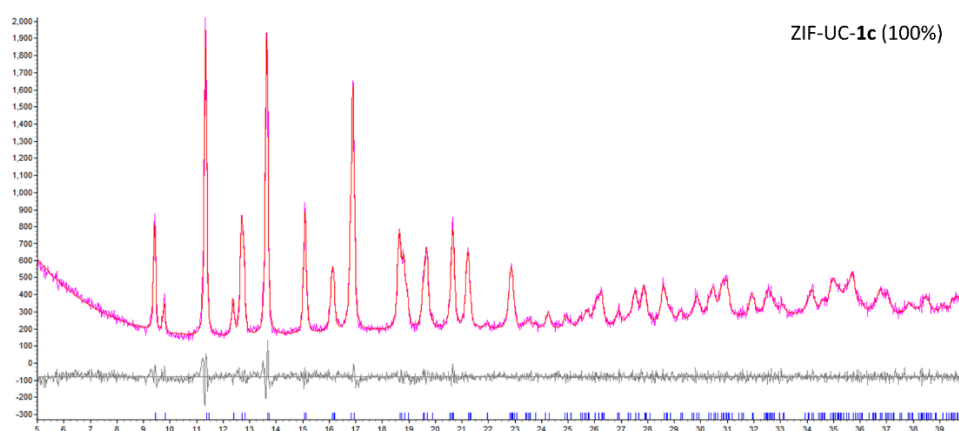

Figure S3. Experimental X-ray diffraction pattern of ZIF-UC-1c powder sample (pink). Pawley refinement using Topas (red).

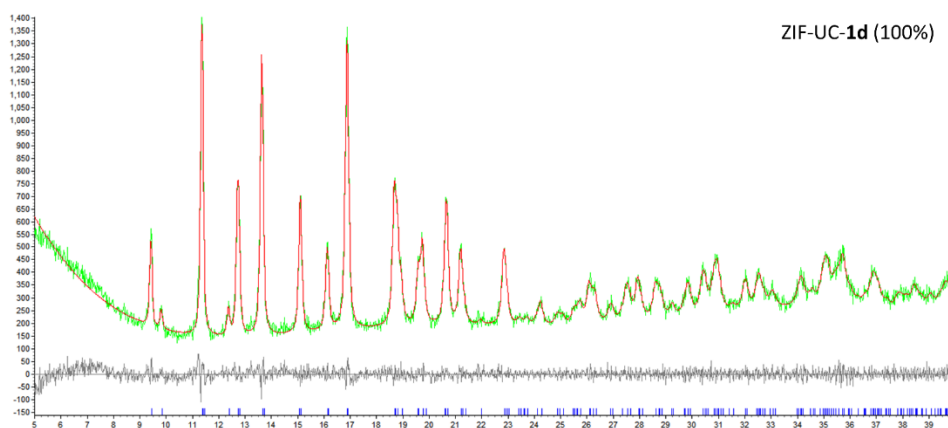

Figure S4. Experimental X-ray diffraction pattern of ZIF-UC-1d powder sample (light green). Pawley refinement using Topas (red).

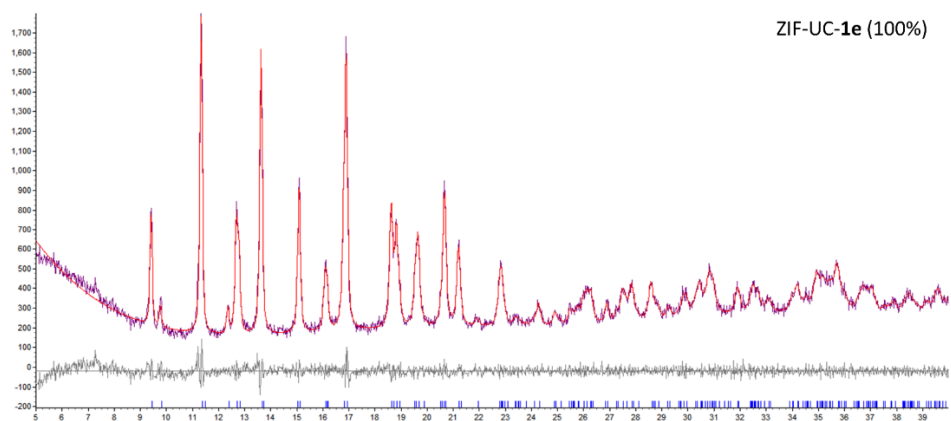

**Figure S5.** Experimental X-ray diffraction pattern of ZIF-UC-1e powder sample (purple). Pawley refinement using Topas (red).

## 1.2. Single crystal diffraction

### ZIF-UC-1a (CAG – Orthorhombic)

#### Experimental and Refinement Details for ZIF-UC-1a

A colourless polyhedral crystal of size  $0.20 \times 0.15 \times 0.10 \text{ mm}^3$ , was placed in a 0.2 mm diameter borosilicate loop and mounted on a Gemini E Ultra diffractometer from Oxford Diffraction equipped with an Atlas CCD area detector and operated at 1200 W power (35 kV, 35 mA) to generate Cu K $\alpha$  radiation ( $\lambda = 1.54184 \text{ \AA}$ ) at 293(2) K. A total of 10797 reflections were collected, of which 3902 were unique and 3145 of these were greater than  $2\sigma(I)$ . The value of  $\theta$  went from  $2.3658^\circ$  to  $64.029^\circ$ . Analysis of the data showed negligible decay during collection. The structure was solved in the orthorhombic *Pbca* space group with  $Z = 8$  using SUPERFLIP method.<sup>2</sup> Modelling of electron density within the void of the frameworks leads to identification of 0.91 N,N-Diethylformamide (DEF) guest molecules in the asymmetric unit (in addition to 2 independent Zn and 4 independent linkers). From those linkers, 2 are unsubstituted 1m with no disorder, the third linker position is disordered between 0.60 1m, 0.23 blm and 0.17 mb1m and the fourth position is disordered between 0.13 blm and 0.87 1m. Note that the third position can contain a maximum of 0.5 occupancy for mb1m linkers, because a centre of symmetry in this space group would bring the mb1m linkers related by this centre into contact with each other. In the fourth position, on the other hand, the blm linker is shifted away from the 1m position by  $53.7^\circ$  to avoid sterically clashing with a neighbouring 1m linker in a fully occupied position. Such symmetry limitations result in blm linkers partially occupying the same crystallographic position as DEF molecules. With the exception of the carbon atoms within blm and mb1m linkers, the nitrogen atoms in the third position and the solvent atoms, all non-hydrogen atoms have been refined anisotropically. All hydrogen atoms have been placed in geometrically located positions and their displacement parameters are tied to those of the attached carbon atoms. Hydrogens atoms for the benzene ring in the third linker position and for the methyl group in the fourth position have not been included because the occupancy is low to provide accurate coordinates. The unit cell of ZIF-UC-1a contains 1.74 1m and 0.18 blm and 0.08 mb1m per zinc. Final full matrix least squares (50 cycles) refinement on  $F^2$  converged to  $R1 = 0.0665$  ( $F > 2\sigma F$ ) and  $wR2 = 0.2121$  with GOOF = 1.077. CCDC Deposition Number 1943552.

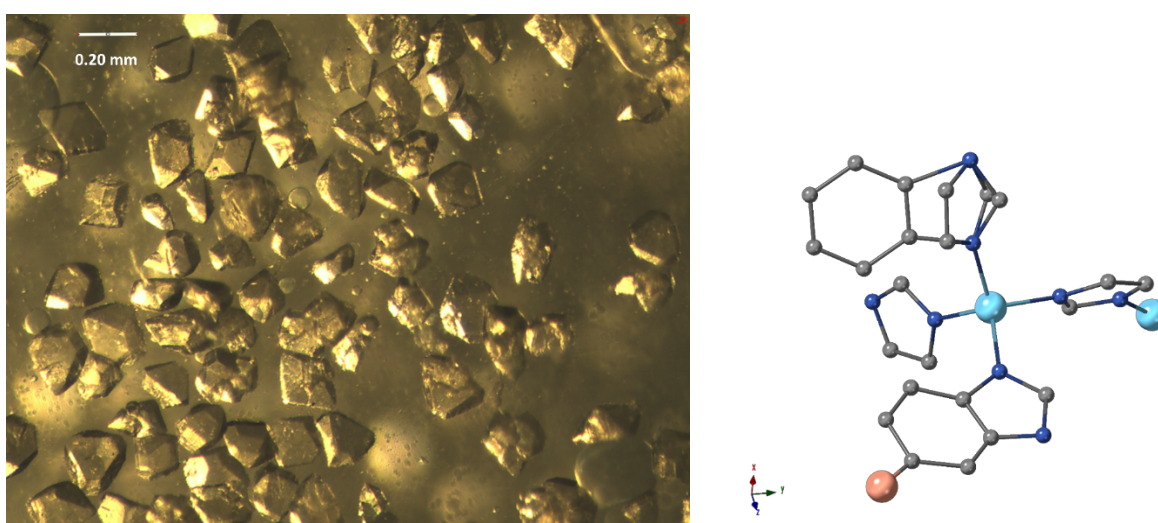

**Figure S6.** Single crystals of ZIF-UC-1a: Optical images (left) and asymmetric unit (right). C- grey, C- dark blue, Zn- light blue. A carbon atom is also coloured orange, which indicates the methyl group. Hydrogen atoms and the solvent are omitted for clarity.

**Table S2.** Crystal data and structure refinement for ZIF-UC-1a.

|                                                     |                                                                                                                                                   |
|-----------------------------------------------------|---------------------------------------------------------------------------------------------------------------------------------------------------|
| Chemical formula                                    | C <sub>18.84</sub> H <sub>22.06</sub> N <sub>8.92</sub> O <sub>0.92</sub> Zn <sub>2</sub>                                                         |
| Formula weight                                      | 517.74 g/mol                                                                                                                                      |
| Temperature                                         | 293(2) K                                                                                                                                          |
| Wavelength                                          | 1.54184 Å                                                                                                                                         |
| Crystal system                                      | Orthorhombic                                                                                                                                      |
| Space group                                         | <i>Pbca</i>                                                                                                                                       |
| Unit cell dimensions                                | $a = 15.7365(4) \text{ Å}$ $\alpha = 90^\circ$<br>$b = 16.0434(4) \text{ Å}$ $\beta = 90^\circ$<br>$c = 18.6754(7) \text{ Å}$ $\gamma = 90^\circ$ |
| Volume                                              | 4714.9(2) Å <sup>3</sup>                                                                                                                          |
| Density (calculated)                                | 1.460 g/cm <sup>3</sup>                                                                                                                           |
| Absorption coefficient                              | 2.73                                                                                                                                              |
| <i>F</i> (000)                                      | 2364.64                                                                                                                                           |
| Crystal size                                        | 0.20 x 0.15 x 0.10 mm <sup>3</sup>                                                                                                                |
| Theta range for data collection                     | 2.3658 - 64.029°                                                                                                                                  |
| Index ranges                                        | -16 ≤ <i>h</i> ≤ 18, -10 ≤ <i>k</i> ≤ 10, -21 ≤ <i>l</i> ≤ 21                                                                                     |
| Reflections collected                               | 10797                                                                                                                                             |
| Independent reflections                             | 3902                                                                                                                                              |
| Completeness to theta = 66.9682 °                   | 99.68 %                                                                                                                                           |
| Absorption correction                               | multi-scan                                                                                                                                        |
| Refinement method                                   | Full-matrix least-squares on <i>F</i> <sup>2</sup>                                                                                                |
| Data / restraints / parameters                      | 3902 / 22 / 237                                                                                                                                   |
| Goodness-of-fit on <i>F</i> <sup>2</sup>            | 1.077                                                                                                                                             |
| Final <i>R</i> indices [ <i>I</i> > 2σ( <i>I</i> )] | <i>R</i> 1 = 0.0665, <i>wR</i> 2 = 0.2121                                                                                                         |
| <i>R</i> indices (all data)                         | <i>R</i> 1 = 0.0771, <i>wR</i> 2 = 0.2261                                                                                                         |
| Largest diff. peak and hole                         | 0.845 and -0.439 e. Å <sup>-3</sup>                                                                                                               |

ZIF-UC-1f (CAG – Orthorhombic)  
Experimental and Refinement Details for ZIF-UC-1f

A colourless polyhedral crystal of size 0.15 x 0.12 x 0.10 mm<sup>3</sup>, was placed in a 0.2 mm diameter borosilicate loop and mounted on a Gemini E Ultra diffractometer from Oxford Diffraction equipped with an Atlas CCD area detector and operated at 1200 W power (35 kV, 35 mA) to generate Cu K $\alpha$  radiation ( $\lambda$  = 1.54184 Å) at 293(2) K. A total of 10732 reflections were collected, of which 3844 were unique and 3025 of these were greater than 2 $\sigma$  (I). The varied of  $\theta$  was from 2.3789° to 64.1320°. Analysis of the data showed negligible decay during collection. The structure was solved in the orthorhombic *Pbca* space group with Z = 8 using SUPERFLIP method.<sup>2</sup> Modelling of electron density within the void of the frameworks leads to identification of 0.88 N,N-Diethylformamide (DEF) guest molecules in the asymmetric unit (in addition to 2 independent Zn and 4 independent linkers). From those linkers, 2 are unsubstituted Im with no disorder, the third linker position is disordered between 0.54 Im, 0.31 blm and 0.15 mblm; while the fourth position is disordered between 0.12 mblm and 0.88 Im. Note that the third position can contain a maximum of 0.5 occupancy for blm and mblm linkers, because a centre of symmetry in this space group would bring the linkers related by this centre into contact with each other. In the fourth position, on the other hand, the blm linker is shifted away from the Im position by 56.6° to avoid sterically clashing with a neighbouring Im linker in a fully occupied position. Such symmetry limitations result in blm linkers partially occupying the same crystallographic position as DEF molecules. Carbon atoms within blm and mblm linkers (except two) and the solvent atoms were refined isotropically. The rests of non-hydrogen atoms have been refined anisotropically. All hydrogen atoms have been placed in geometrically located positions and their displacement parameters are tied to those of the attached carbon atoms. Hydrogens atoms for the mblm linker in the fourth position and for the methyl group in the third position have not been included because of the shared electronic density with the solvent molecule (in the first case) and because the occupancy is low to provide accurate coordinates (in the second case). The unit cell of ZIF-UC-1f contains 1.71 Im, 0.16 blm and 0.13 mblm per zinc. Final full matrix least squares refinement (50 cycles) on  $F^2$  converged to  $R1$  = 0.0820 ( $F > 2\sigma F$ ) and  $wR2$  = 0.2416 with GOOF = 1.056. CCDC deposition number 1943553.

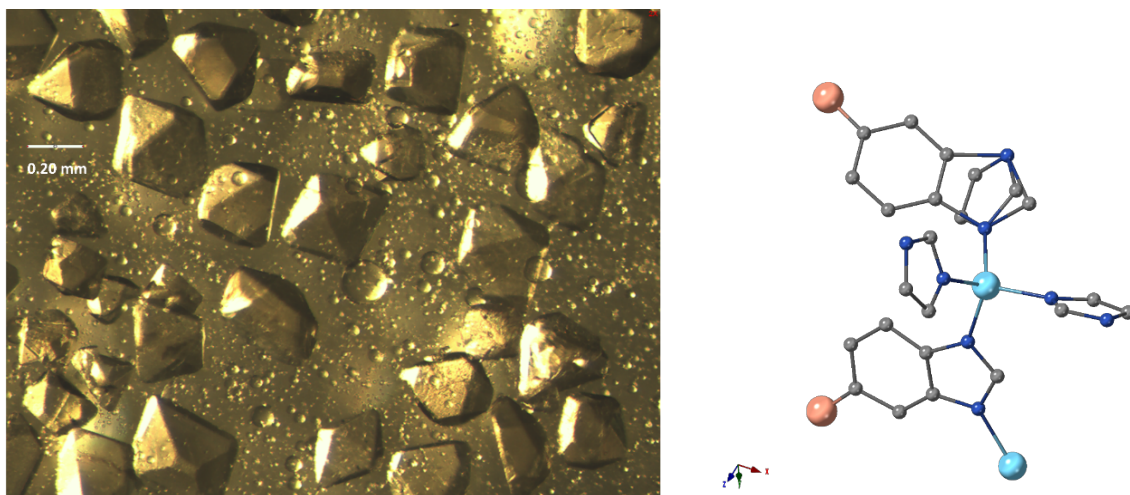

**Figure S7.** Single crystals of ZIF-UC-1f: Optical images (left) and asymmetric unit (right). C- grey, C- dark blue, Zn- light blue. Two carbon atoms are also coloured orange, which indicates the methyl groups. Hydrogen atoms and the solvent are omitted for clarity.

**Table S3.** Crystal data and structure refinement for ZIF-UC-1f.

|                                                     |                                                                                                                                                     |
|-----------------------------------------------------|-----------------------------------------------------------------------------------------------------------------------------------------------------|
| Chemical formula                                    | C <sub>18.98</sub> H <sub>23.37</sub> N <sub>8.88</sub> O <sub>0.88</sub> Zn <sub>2</sub>                                                           |
| Formula weight                                      | 520.78 g/mol                                                                                                                                        |
| Temperature                                         | 293(2) K                                                                                                                                            |
| Wavelength                                          | 1.54184 Å                                                                                                                                           |
| Crystal system                                      | Orthorhombic                                                                                                                                        |
| Space group                                         | <i>Pbca</i>                                                                                                                                         |
| Unit cell dimensions                                | $a = 15.9807(11) \text{ Å}$ $\alpha = 90^\circ$<br>$b = 18.5721(16) \text{ Å}$ $\beta = 90^\circ$<br>$c = 15.6944(8) \text{ Å}$ $\gamma = 90^\circ$ |
| Volume                                              | 4658.0(6) Å <sup>3</sup>                                                                                                                            |
| Density (calculated)                                | 1.481 g/cm <sup>3</sup>                                                                                                                             |
| Absorption coefficient                              | 2.76                                                                                                                                                |
| <i>F</i> (000)                                      | 2377.52                                                                                                                                             |
| Crystal size                                        | 0.15 x 0.12 x 0.10 mm <sup>3</sup>                                                                                                                  |
| Theta range for data collection                     | 2.3789 ° - 64.1320 °                                                                                                                                |
| Index ranges                                        | -18 ≤ <i>h</i> ≤ 16, -21 ≤ <i>k</i> ≤ 18, -15 ≤ <i>l</i> ≤ 18                                                                                       |
| Reflections collected                               | 10732                                                                                                                                               |
| Independent reflections                             | 3844                                                                                                                                                |
| Completeness to theta = 66.9682 °                   | 99.03 %                                                                                                                                             |
| Absorption correction                               | 'multi-scan'                                                                                                                                        |
| Refinement method                                   | Full-matrix least-squares on <i>F</i> <sup>2</sup>                                                                                                  |
| Data / restraints / parameters                      | 3844 / 19 / 267                                                                                                                                     |
| Goodness-of-fit on <i>F</i> <sup>2</sup>            | 1.056                                                                                                                                               |
| Final <i>R</i> indices [ <i>I</i> > 2σ( <i>I</i> )] | <i>R</i> 1 = 0.0820 , <i>wR</i> 2 = 0.2416                                                                                                          |
| <i>R</i> indices (all data)                         | <i>R</i> 1 = 0.0964 , <i>wR</i> 2 = 0.2590                                                                                                          |
| Largest diff. peak and hole                         | 0.970 and -0.378 e. Å <sup>-3</sup>                                                                                                                 |

ZIF-UC-**1g** (CAG – Orthorhombic)  
Experimental and Refinement Details for ZIF-UC-**1g**

A colourless polyhedral crystal of size 0.15 x 0.10 x 0.05 mm<sup>3</sup>, was placed in a 0.1 mm diameter borosilicate loop and mounted on a Gemini E Ultra diffractometer from Oxford Diffraction equipped with an Atlas CCD area detector and operated at 1200 W power (35 kV, 35 mA) to generate Cu K $\alpha$  radiation ( $\lambda$  = 1.54184 Å) at 293(2) K. A total of 10112 reflections were collected, of which 3836 were unique and 3390 of these were greater than 2 $\sigma$  (I). The range of  $\theta$  was from 2.3801° to 63.9444°. Analysis of the data showed negligible decay during collection. The structure was solved in the orthorhombic *Pbca* space group with *Z* = 8 using SUPERFLIP method.<sup>2</sup> Modelling of electron density within the void of the frameworks leads to identification of 0.65 N,N-Diethylformamide (DEF) guest molecules in the asymmetric unit (in addition to 2 independent Zn and 4 independent linkers). From those linkers, 2 are unsubstituted Im with no disorder, the third linker position is disordered between 0.52 Im, 0.41 blm and 0.07 mblm; the fourth linker position is 0.32 mblm and 0.68 Im. Note that the third position can contain a maximum of 0.5 occupancy between blm and mblm, because a centre of symmetry in this space group would bring non-Im linkers related by this centre into contact with each other. The mblm linker in the fourth position is shifted away from the imidazole position by 60.7° to avoid sterically clashing with a neighbouring Im linker in a fully occupied position. Such symmetry limitation results in blm linkers partially occupying the same crystallographic position as DEF molecules. All non-hydrogen atoms were refined anisotropically, except solvent atoms and Carbon atoms from blm and mblm benzene rings. All hydrogen atoms have been placed in geometrically located positions and their displacement parameters are tied to those of the attached carbon atoms. Hydrogens atoms for the mblm linker in the fourth position and for the methyl group in the third position have not been included because of the shared electronic density with the solvent molecule (in the first case) and because the occupancy is low to provide accurate coordinates (in the second case). The unit cell of ZIF-UC-**1g** contains 1.60 Im, 0.21 blm and 0.19 mblm per zinc. Final full matrix least squares (50 cycles) refinement on  $F^2$  converged to  $R1$  = 0.0785 ( $F > 2\sigma F$ ) and  $wR2$  = 0.2299 with GOOF = 1.175. CCDC deposition number 1943554.

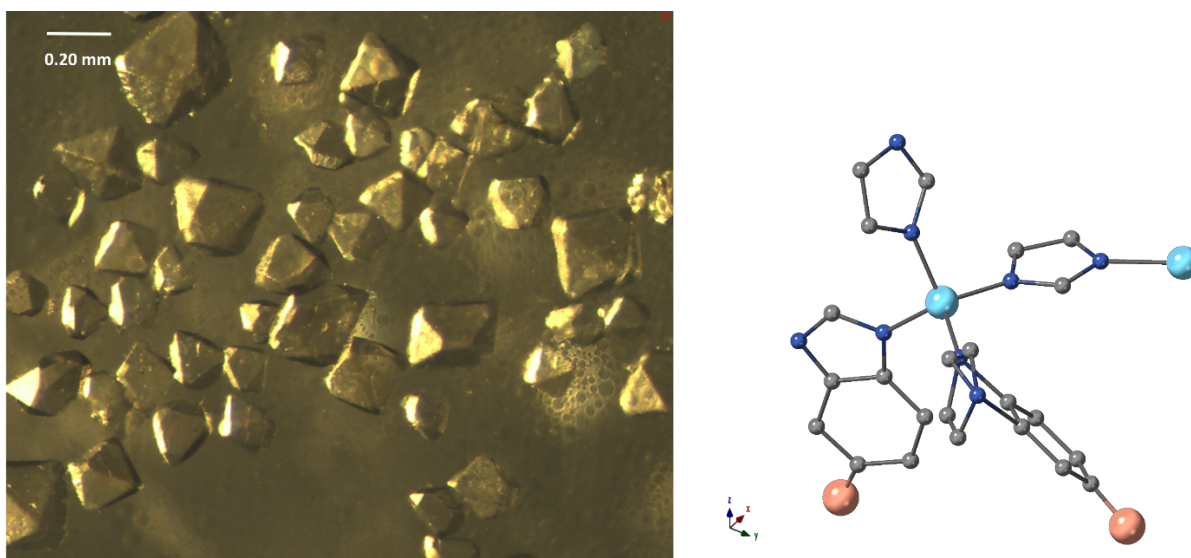

**Figure S8.** Single crystals of ZIF-UC-**1g**: Optical images (left) and asymmetric unit (right). C- grey, C- dark blue, Zn- light blue. Two carbon atoms are also coloured orange, which indicates the methyl groups. Hydrogen atoms and the solvent are omitted for clarity.

**Table S4.** Crystal data and structure refinement for ZIF-UC-1g.

|                                                     |                                                                                                                                                   |
|-----------------------------------------------------|---------------------------------------------------------------------------------------------------------------------------------------------------|
| Chemical formula                                    | C <sub>18.78</sub> H <sub>21.46</sub> N <sub>8.65</sub> O <sub>0.65</sub> Zn <sub>2</sub>                                                         |
| Formula weight                                      | 509.55 g/mol                                                                                                                                      |
| Temperature                                         | 293(2) K                                                                                                                                          |
| Wavelength                                          | 1.54184 Å                                                                                                                                         |
| Crystal system                                      | Orthorhombic                                                                                                                                      |
| Space group                                         | <i>Pbca</i>                                                                                                                                       |
| Unit cell dimensions                                | $a = 15.6574(5) \text{ Å}$ $\alpha = 90^\circ$<br>$b = 15.9532(5) \text{ Å}$ $\beta = 90^\circ$<br>$c = 18.5634(7) \text{ Å}$ $\gamma = 90^\circ$ |
| Volume                                              | 4636.9(3) Å <sup>3</sup>                                                                                                                          |
| Density (calculated)                                | 1.457 g/cm <sup>3</sup>                                                                                                                           |
| Absorption coefficient                              | 2.75                                                                                                                                              |
| <i>F</i> (000)                                      | 2319.76                                                                                                                                           |
| Crystal size                                        | 0.15 x 0.10 x 0.05 mm <sup>3</sup>                                                                                                                |
| Theta range for data collection                     | 2.7540 - 63.8120 °                                                                                                                                |
| Index ranges                                        | -16 ≤ <i>h</i> ≤ 18, -18 ≤ <i>k</i> ≤ 18, -13 ≤ <i>l</i> ≤ 21                                                                                     |
| Reflections collected                               | 10112                                                                                                                                             |
| Independent reflections                             | 3836                                                                                                                                              |
| Completeness to theta = 66.9682°                    | 99.79 %                                                                                                                                           |
| Absorption correction                               | multi-scan                                                                                                                                        |
| Refinement method                                   | Full-matrix least-squares on <i>F</i> <sup>2</sup>                                                                                                |
| Data / restraints / parameters                      | 3836 / 19 / 250                                                                                                                                   |
| Goodness-of-fit on <i>F</i> <sup>2</sup>            | 1.175                                                                                                                                             |
| Final <i>R</i> indices [ <i>I</i> > 2σ( <i>I</i> )] | <i>R</i> 1 = 0.0785 , <i>wR</i> 2 = 0.2299                                                                                                        |
| <i>R</i> indices (all data)                         | <i>R</i> 1 = 0.0845 , <i>wR</i> 2 = 0.2349                                                                                                        |
| Largest diff. peak and hole                         | 0.961 and -0.556 e. Å <sup>-3</sup>                                                                                                               |

## 2. Chemical composition of powder and glass samples

**Table S5.** Summary of nuclear magnetic resonance results.

| Samples                        | Integration ratio<br>[lm: blm: mblm] | Formula                                                              | Composition                                                        |
|--------------------------------|--------------------------------------|----------------------------------------------------------------------|--------------------------------------------------------------------|
| ZIF-UC-1a                      | 1 : 0.10 : 0.05                      | Zn (lm) <sub>1.74</sub> (blm) <sub>0.17</sub> (mblm) <sub>0.09</sub> | Zn <sub>1</sub> C <sub>7.13</sub> N <sub>4</sub> H <sub>6.70</sub> |
| <i>a<sub>g</sub></i> ZIF-UC-1a | 1 : 0.10 : 0.05                      | Zn (lm) <sub>1.74</sub> (blm) <sub>0.17</sub> (mblm) <sub>0.09</sub> | Zn <sub>1</sub> C <sub>7.13</sub> N <sub>4</sub> H <sub>6.70</sub> |
| ZIF-UC-1b                      | 1 : 0.13 : 0.07                      | Zn (lm) <sub>1.66</sub> (blm) <sub>0.22</sub> (mblm) <sub>0.12</sub> | Zn <sub>1</sub> C <sub>7.45</sub> N <sub>4</sub> H <sub>6.90</sub> |
| <i>a<sub>g</sub></i> ZIF-UC-1b | 1 : 0.13 : 0.07                      | Zn (lm) <sub>1.66</sub> (blm) <sub>0.22</sub> (mblm) <sub>0.12</sub> | Zn <sub>1</sub> C <sub>7.45</sub> N <sub>4</sub> H <sub>6.90</sub> |
| ZIF-UC-1c                      | 1 : 0.10 : 0.09                      | Zn (lm) <sub>1.68</sub> (blm) <sub>0.17</sub> (mblm) <sub>0.15</sub> | Zn <sub>1</sub> C <sub>7.43</sub> N <sub>4</sub> H <sub>6.94</sub> |
| <i>a<sub>g</sub></i> ZIF-UC-1c | 1 : 0.10 : 0.09                      | Zn (lm) <sub>1.68</sub> (blm) <sub>0.17</sub> (mblm) <sub>0.15</sub> | Zn <sub>1</sub> C <sub>7.43</sub> N <sub>4</sub> H <sub>6.94</sub> |
| ZIF-UC-1d                      | 1 : 0.17 : 0.09                      | Zn (lm) <sub>1.59</sub> (blm) <sub>0.27</sub> (mblm) <sub>0.14</sub> | Zn <sub>1</sub> C <sub>7.79</sub> N <sub>4</sub> H <sub>7.11</sub> |
| <i>a<sub>g</sub></i> ZIF-UC-1d | 1 : 0.17 : 0.09                      | Zn (lm) <sub>1.59</sub> (blm) <sub>0.27</sub> (mblm) <sub>0.14</sub> | Zn <sub>1</sub> C <sub>7.79</sub> N <sub>4</sub> H <sub>7.11</sub> |
| ZIF-UC-1e                      | 1 : 0.11 : 0.13                      | Zn (lm) <sub>1.61</sub> (blm) <sub>0.18</sub> (mblm) <sub>0.21</sub> | Zn <sub>1</sub> C <sub>7.76</sub> N <sub>4</sub> H <sub>7.19</sub> |
| <i>a<sub>g</sub></i> ZIF-UC-1e | 1 : 0.11 : 0.13                      | Zn (lm) <sub>1.61</sub> (blm) <sub>0.18</sub> (mblm) <sub>0.21</sub> | Zn <sub>1</sub> C <sub>7.76</sub> N <sub>4</sub> H <sub>7.19</sub> |

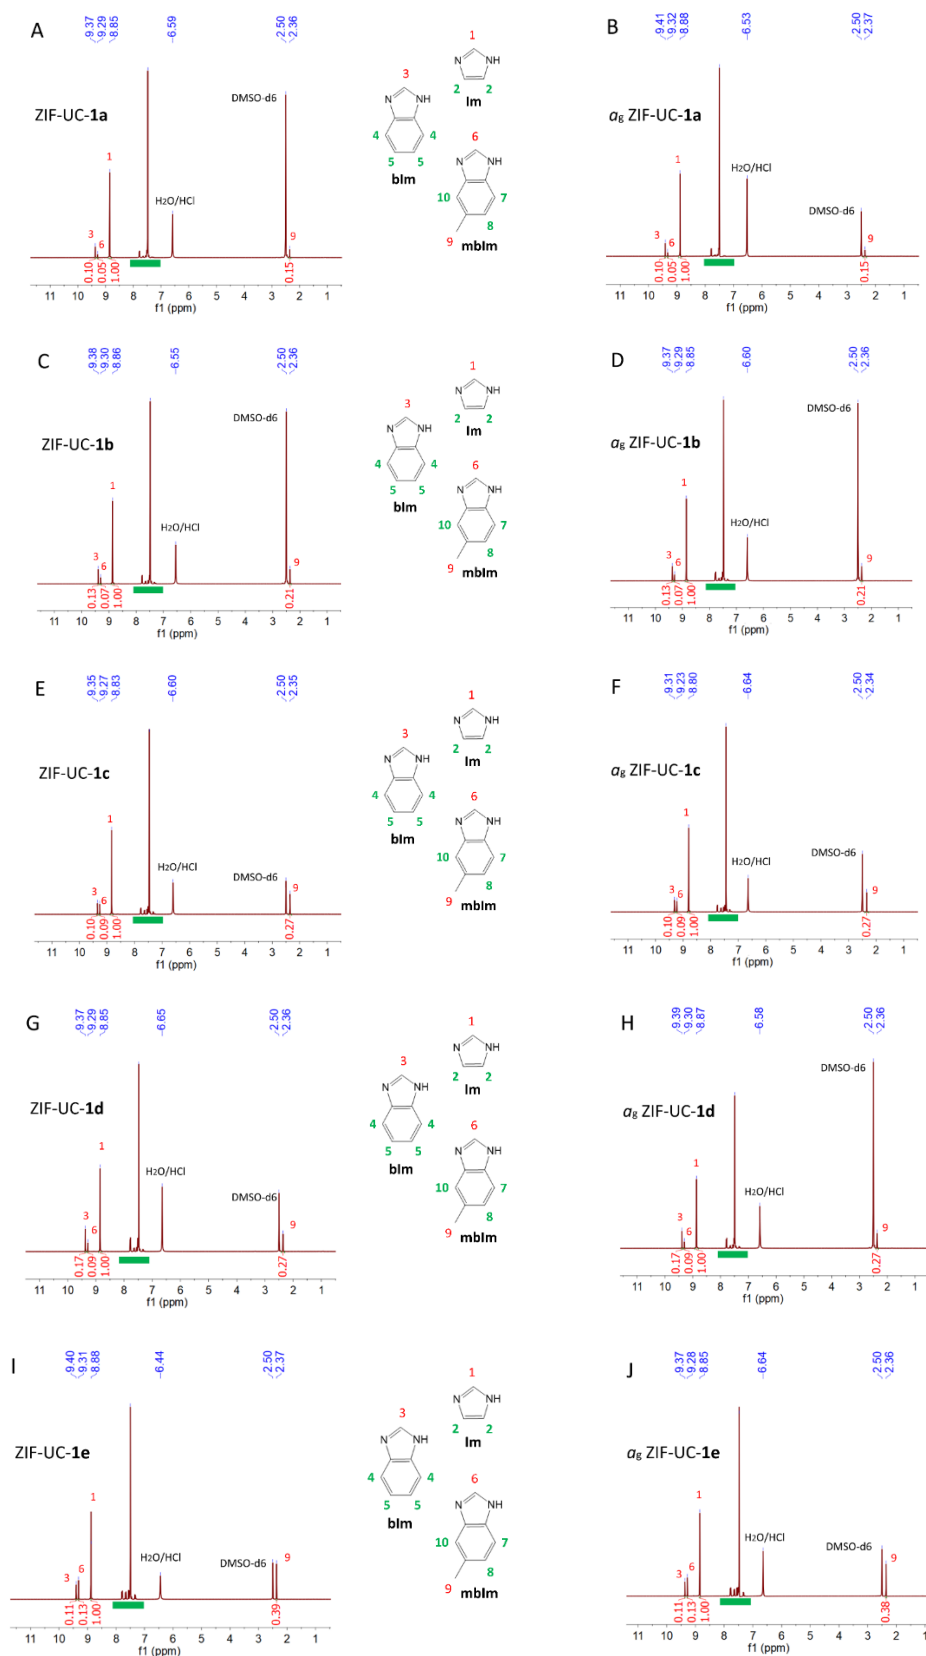

**Figure S9.** Nuclear magnetic resonance spectra for crystalline and glasses samples. Peaks inside the region highlighted in green correspond to aromatic hydrogen atoms. The DMSO-d<sub>6</sub> peak was set to be at 2.500 ppm, according to the values provided in the software MestReNova version 6.0.2-5475.

**Table S6.** Summary of elemental analysis results. Zn % was indirectly determined from HCN results.

| Samples                        | Weight<br>(mgs) | C %        |             | N %        |             | H %        |             | Zn %       |             |
|--------------------------------|-----------------|------------|-------------|------------|-------------|------------|-------------|------------|-------------|
|                                |                 | <i>exp</i> | <i>calc</i> | <i>exp</i> | <i>calc</i> | <i>exp</i> | <i>calc</i> | <i>exp</i> | <i>calc</i> |
| ZIF-UC-1a                      | 0.69            | 38.15      | 40.05       | 24.65      | 26.2        | 3.14       | 3.16        | 34.06      | 30.58       |
| <i>a<sub>g</sub></i> ZIF-UC-1a | 1.00            | 38.68      | 40.05       | 25.61      | 26.2        | 3.02       | 3.16        | 32.69      | 30.58       |
| ZIF-UC-1b                      | 1.83            | 39.18      | 41.07       | 24.91      | 25.72       | 3.11       | 3.19        | 32.80      | 30.02       |
| <i>a<sub>g</sub></i> ZIF-UC-1b | 2.58            | 38.96      | 41.07       | 24.92      | 25.72       | 3.15       | 3.19        | 32.97      | 30.02       |
| ZIF-UC-1c                      | 1.71            | 39.40      | 41.00       | 25.09      | 25.74       | 3.13       | 3.21        | 32.38      | 30.04       |
| <i>a<sub>g</sub></i> ZIF-UC-1c | 1.15            | 39.32      | 41.00       | 25.05      | 25.74       | 2.99       | 3.21        | 32.64      | 30.04       |
| ZIF-UC-1d                      | 1.00            | 40.18      | 42.12       | 24.23      | 25.22       | 3.01       | 3.23        | 32.58      | 29.44       |
| <i>a<sub>g</sub></i> ZIF-UC-1d | 1.47            | 40.08      | 42.12       | 24.31      | 25.22       | 2.95       | 3.23        | 32.66      | 29.44       |
| ZIF-UC-1e                      | 0.85            | 40.39      | 42.01       | 24.00      | 25.25       | 2.91       | 3.27        | 32.70      | 29.47       |
| <i>a<sub>g</sub></i> ZIF-UC-1e | 1.76            | 40.55      | 42.01       | 24.31      | 25.25       | 3.05       | 3.27        | 32.09      | 29.47       |

### 3. Differential scanning calorimetry

Each experiment was designed to run three scans with results listed in Table S7. Original scans are shown in Figure S10. Glass transition temperatures were reported as the midpoint of the glass transition interval, while melting temperatures were determined at the offset of the melting peaks.

**Table S7.** Experimental results from DSC scans.

| Samples   | Composition                                                          | $T_g$ (K) | $T_m$ onset (K) | $T_m$ offset (K) | $\Delta H_m$ (J/g) |
|-----------|----------------------------------------------------------------------|-----------|-----------------|------------------|--------------------|
| ZIF-UC-1a | Zn (Im) <sub>1.74</sub> (blm) <sub>0.17</sub> (mbIm) <sub>0.09</sub> | 588       | 561             | 706              | 16.2               |
| ZIF-UC-1b | Zn (Im) <sub>1.66</sub> (blm) <sub>0.22</sub> (mbIm) <sub>0.12</sub> | 578       | 563             | 691              | 18.9               |
| ZIF-UC-1c | Zn (Im) <sub>1.68</sub> (blm) <sub>0.17</sub> (mbIm) <sub>0.15</sub> | 584       | 575             | 698              | 20.8               |
| ZIF-UC-1d | Zn (Im) <sub>1.59</sub> (blm) <sub>0.27</sub> (mbIm) <sub>0.14</sub> | 583       | 546             | 693              | 21.7               |
| ZIF-UC-1e | Zn (Im) <sub>1.61</sub> (blm) <sub>0.18</sub> (mbIm) <sub>0.21</sub> | 589       | 558             | 703              | 27.9               |

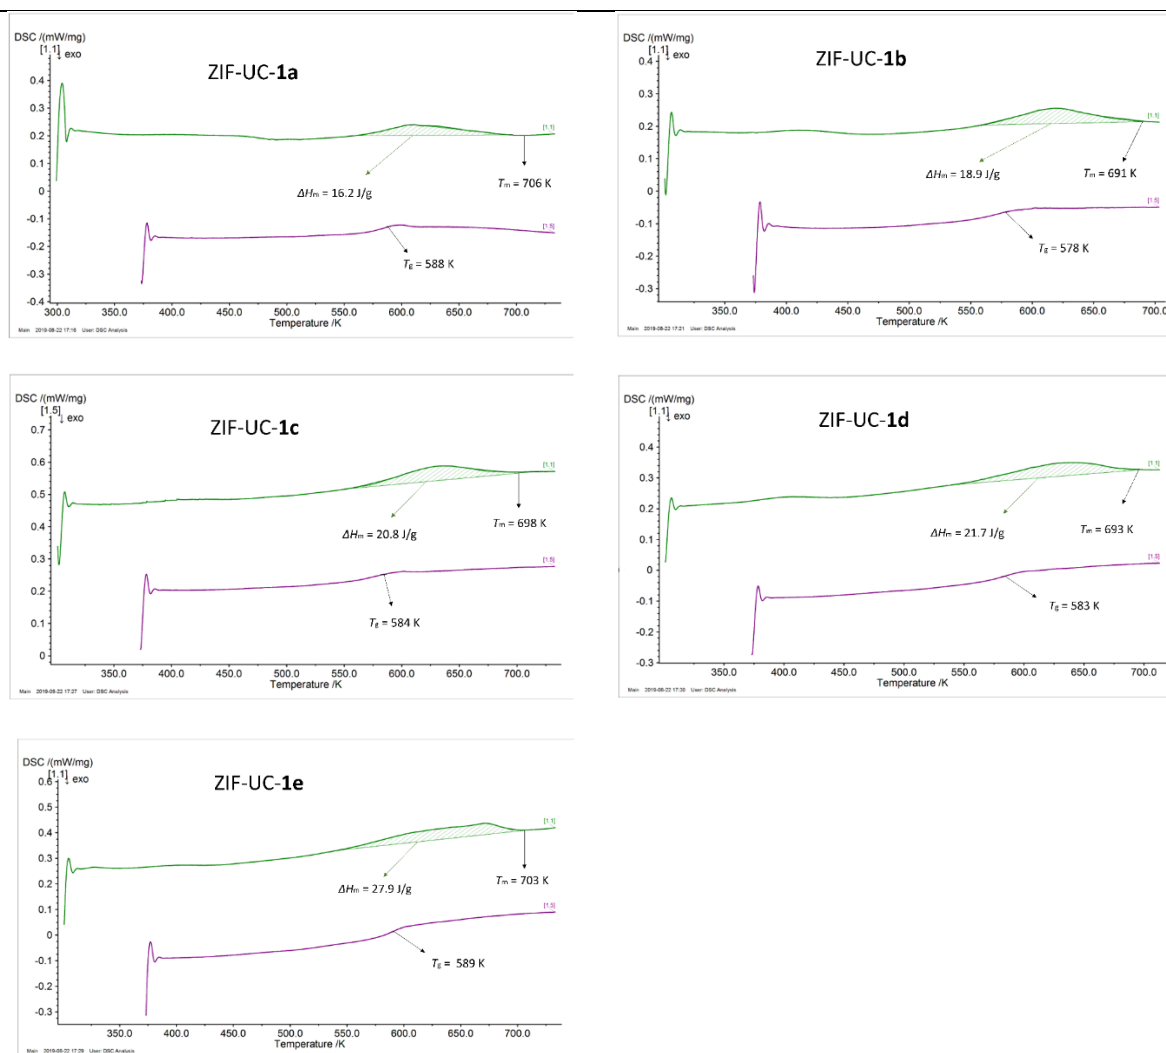

**Figure S10.** DSC scans. Melting and glass transition temperatures are highlighted, as well as the change in enthalpy of melting. First upscan shown in green and second in purple.

#### 4. Statistical analysis

**Table S8.** Probabilities for tetrahedral configurations  $\text{Zn}(\text{Im})_k (\text{blm})_l (\text{mbIm})_m$ , ( $k + l + m = 4$ ).

|   |   |   | $F_j(k, l, m)$ |           |           |           |           |
|---|---|---|----------------|-----------|-----------|-----------|-----------|
| k | l | m | ZIF-UC-1a      | ZIF-UC-1b | ZIF-UC-1c | ZIF-UC-1d | ZIF-UC-1e |
| 0 | 0 | 4 | 4.10E-06       | 1.30E-05  | 3.16E-05  | 2.40E-05  | 1.22E-04  |
| 0 | 1 | 3 | 3.10E-05       | 9.50E-05  | 1.43E-04  | 1.85E-04  | 4.17E-04  |
| 0 | 2 | 2 | 8.78E-05       | 2.61E-04  | 2.44E-04  | 5.36E-04  | 5.36E-04  |
| 0 | 3 | 1 | 1.11E-04       | 3.19E-04  | 1.84E-04  | 6.89E-04  | 3.06E-04  |
| 0 | 4 | 0 | 5.22E-05       | 1.46E-04  | 5.22E-05  | 3.32E-04  | 6.56E-05  |
| 1 | 0 | 3 | 3.17E-04       | 7.17E-04  | 1.42E-03  | 1.09E-03  | 3.73E-03  |
| 1 | 1 | 2 | 1.80E-03       | 3.94E-03  | 4.82E-03  | 6.31E-03  | 9.59E-03  |
| 1 | 2 | 1 | 3.39E-03       | 7.23E-03  | 5.46E-03  | 1.22E-02  | 8.22E-03  |
| 1 | 3 | 0 | 2.14E-03       | 4.42E-03  | 2.06E-03  | 7.82E-03  | 2.35E-03  |
| 2 | 0 | 2 | 9.20E-03       | 1.49E-02  | 2.38E-02  | 1.86E-02  | 4.29E-02  |
| 2 | 1 | 1 | 3.47E-02       | 5.46E-02  | 5.40E-02  | 7.17E-02  | 7.35E-02  |
| 2 | 2 | 0 | 3.28E-02       | 5.00E-02  | 3.06E-02  | 6.91E-02  | 3.15E-02  |
| 3 | 0 | 1 | 1.19E-01       | 1.37E-01  | 1.78E-01  | 1.41E-01  | 2.19E-01  |
| 3 | 1 | 0 | 2.24E-01       | 2.52E-01  | 2.02E-01  | 2.71E-01  | 1.88E-01  |
| 4 | 0 | 0 | 5.73E-01       | 4.75E-01  | 4.98E-01  | 3.99E-01  | 4.20E-01  |

## 5. Topological constraint theory (TCT) model for $T_g$

Based upon the TCT model recently developed by Yang et al., the relation between  $T_g$  and the atomic degree of freedom in the ternary system  $[Zn(Im_{2-(x+y)}blm_xmbIm_y)]$  can be written as follows

$$T_g \cdot \left[ 3 - \frac{2+14 \cdot (2-x-y) + (26+\Delta_{blm}) \cdot x + (26+\Delta_{mbIm}) \cdot y + \Delta_{ex}}{11+4 \cdot (x+y)} \right] = C \quad (1)$$

Where  $C$  is treated as a fitting parameter and is constant within a given family of glass.  $\Delta_{blm}$  and  $\Delta_{mbIm}$  denote the constraint changes when an  $Im$  is substituted by a  $blm$  or a  $mbIm$  due to the constraint differences between them.  $\Delta_{ex}$  denotes the extra constraint change from special ligand coordination configurations including  $Zn(Im)_3(bIm)_1$ ,  $Zn(Im)_3(mbIm)_1$  and  $Zn(Im)_2(bIm)_1(mbIm)_1$  which is calculated as:

$$\Delta_{ex} = \Delta_{Im_3blm_1} \binom{4}{1} \left( \frac{2-x-y}{2} \right)^3 \left( \frac{x}{2} \right) + \Delta_{Im_3mbIm_1} \binom{4}{1} \left( \frac{2-x-y}{2} \right)^3 \left( \frac{y}{2} \right) + \Delta_{Im_2blm_1mbIm_1} \binom{4}{2} \binom{2}{1} \left( \frac{2-x-y}{2} \right)^2 \left( \frac{x}{2} \right) \left( \frac{y}{2} \right) \quad (2)$$

Here  $\Delta_{Im_3blm_1}$ ,  $\Delta_{Im_3mbIm_1}$  and  $\Delta_{Im_2blm_1mbIm_1}$  denote extra change of constraint due to appearance of one unit of each of the three configurations:  $Zn(Im)_3(bIm)_1$ ,  $Zn(Im)_3(mbIm)_1$  and  $Zn(Im)_2(bIm)_1(mbIm)_1$ . To obtain  $\Delta_{Im_3blm_1}$ ,  $\Delta_{Im_3mbIm_1}$  and  $\Delta_{Im_2blm_1mbIm_1}$ , we fit Eq. (1) using experimentally measured  $T_g$  of  $[Zn(Im_{2-(x+y)}blm_xmbIm_y)]$  by minimizing the residual sum of squares. The resultant predictions are listed in Table S8 with a root-mean-square-error of 3 K. The values of  $C$ ,  $\Delta_{blm}$ ,  $\Delta_{mbIm}$ ,  $\Delta_{Im_3blm_1}$ ,  $\Delta_{Im_3mbIm_1}$  and  $\Delta_{Im_2blm_1mbIm_1}$  are 154.4 K, -0.52, -0.51, 0, 0 and -0.10, respectively, indicating that the effects of  $Zn(Im)_3(bIm)_1$  and  $Zn(Im)_3(mbIm)_1$  on the total atomic constraint can be ignored and the configuration  $Zn(Im)_2(bIm)_1(mbIm)_1$  tends to further reduce the atomic constraint in the ternary system. Based on Eq. (1), the compositional dependence of  $T_g$  for the ternary system is illustrated in Fig. 4a.

**Table S9.** Experimental and predicted glass transition temperatures for a system with chemical composition  $\text{Zn (Im)}_{2-(x+y)} (\text{blm})_x (\text{mbIm})_y$  using molecular dynamic simulations.

| x    | y    | Experimental $T_g$ (K) | Predicted $T_g$ (K) | Error |
|------|------|------------------------|---------------------|-------|
| 0.00 | 0.00 | 565                    | 566.27              | 1.27  |
| 0.03 | 0.00 | 568                    | 569.21              | 1.29  |
| 0.04 | 0.00 | 569                    | 570.80              | 1.53  |
| 0.06 | 0.00 | 571                    | 572.91              | 1.82  |
| 0.08 | 0.00 | 575                    | 575.01              | 0.03  |
| 0.13 | 0.00 | 579                    | 579.41              | 0.65  |
| 0.17 | 0.00 | 584                    | 583.49              | -0.09 |
| 0.19 | 0.00 | 586                    | 585.77              | -0.31 |
| 0.21 | 0.00 | 590                    | 587.77              | -2.19 |
| 0.22 | 0.00 | 592                    | 589.27              | -2.56 |
| 0.25 | 0.00 | 595                    | 591.99              | -3.01 |
| 0.28 | 0.00 | 596                    | 594.94              | -1.06 |
| 0.32 | 0.00 | 600                    | 598.82              | -1.18 |
| 0.36 | 0.00 | 602                    | 602.64              | 0.64  |
| 0.44 | 0.00 | 607                    | 610.15              | 3.15  |
| 0.25 | 0.00 | 591                    | 591.99              | 0.99  |
| 0.00 | 0.50 | 616                    | 616.85              | 0.85  |
| 0.17 | 0.09 | 588                    | 582.47              | -5.53 |
| 0.22 | 0.12 | 578                    | 584.35              | 6.35  |
| 0.17 | 0.15 | 584                    | 582.67              | -1.33 |
| 0.27 | 0.14 | 583                    | 585.98              | 2.98  |
| 0.18 | 0.21 | 589                    | 583.72              | -5.28 |

## 6. Reproducibility of DSC measurements

To estimate the error associated with the determination of  $T_g$ ,  $T_m$  and  $\Delta H_m$  (J/g), five DSC experiments on sample ZIF-UC-1a were performed. Results appear in Table S10 and corresponding DSC scans appears in Fig S11. Glass transition temperatures were reported as the midpoint of the glass transition interval, while melting temperatures were determined at the offset of the melting peaks.

**Table S10.** Experimental results from DSC scans of sample ZIF-UC-1a. Average values and standard deviations were estimated from these 5 measurements.

| Samples       | $T_g$ (K) | $T_m$ onset (K) | $T_m$ end (K) | $\Delta H_m$ (J/g) |
|---------------|-----------|-----------------|---------------|--------------------|
| ZIF-UC-1a     | 591       | 553             | 703           | 16.2               |
| ZIF-UC-1a_I   | 590       | 561             | 706           | 13.8               |
| ZIF-UC-1a_II  | 588       | 557             | 708           | 19.1               |
| ZIF-UC-1a_III | 586       | 543             | 705           | 18.1               |
| ZIF-UC-1a_IV  | 585       | 548             | 699           | 17.2               |
| Average       | 588       | 552             | 704           | 16.9               |
| Std Dev       | 2         | 6               | 3             | 1.5                |

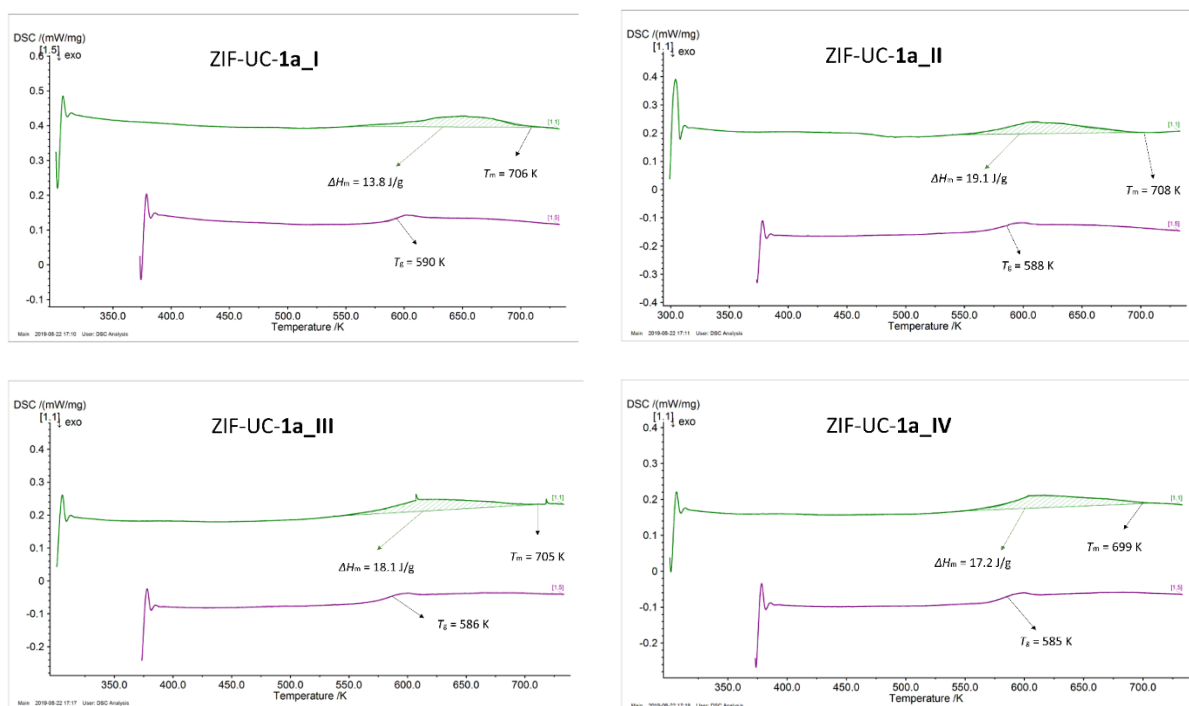

**Figure S11.** Reproducibility measurements for ZIF-UC-1a. The first measurement (ZIF-UC-1a), was already reported in Fig. S10.

## 7. SDT and TGA data

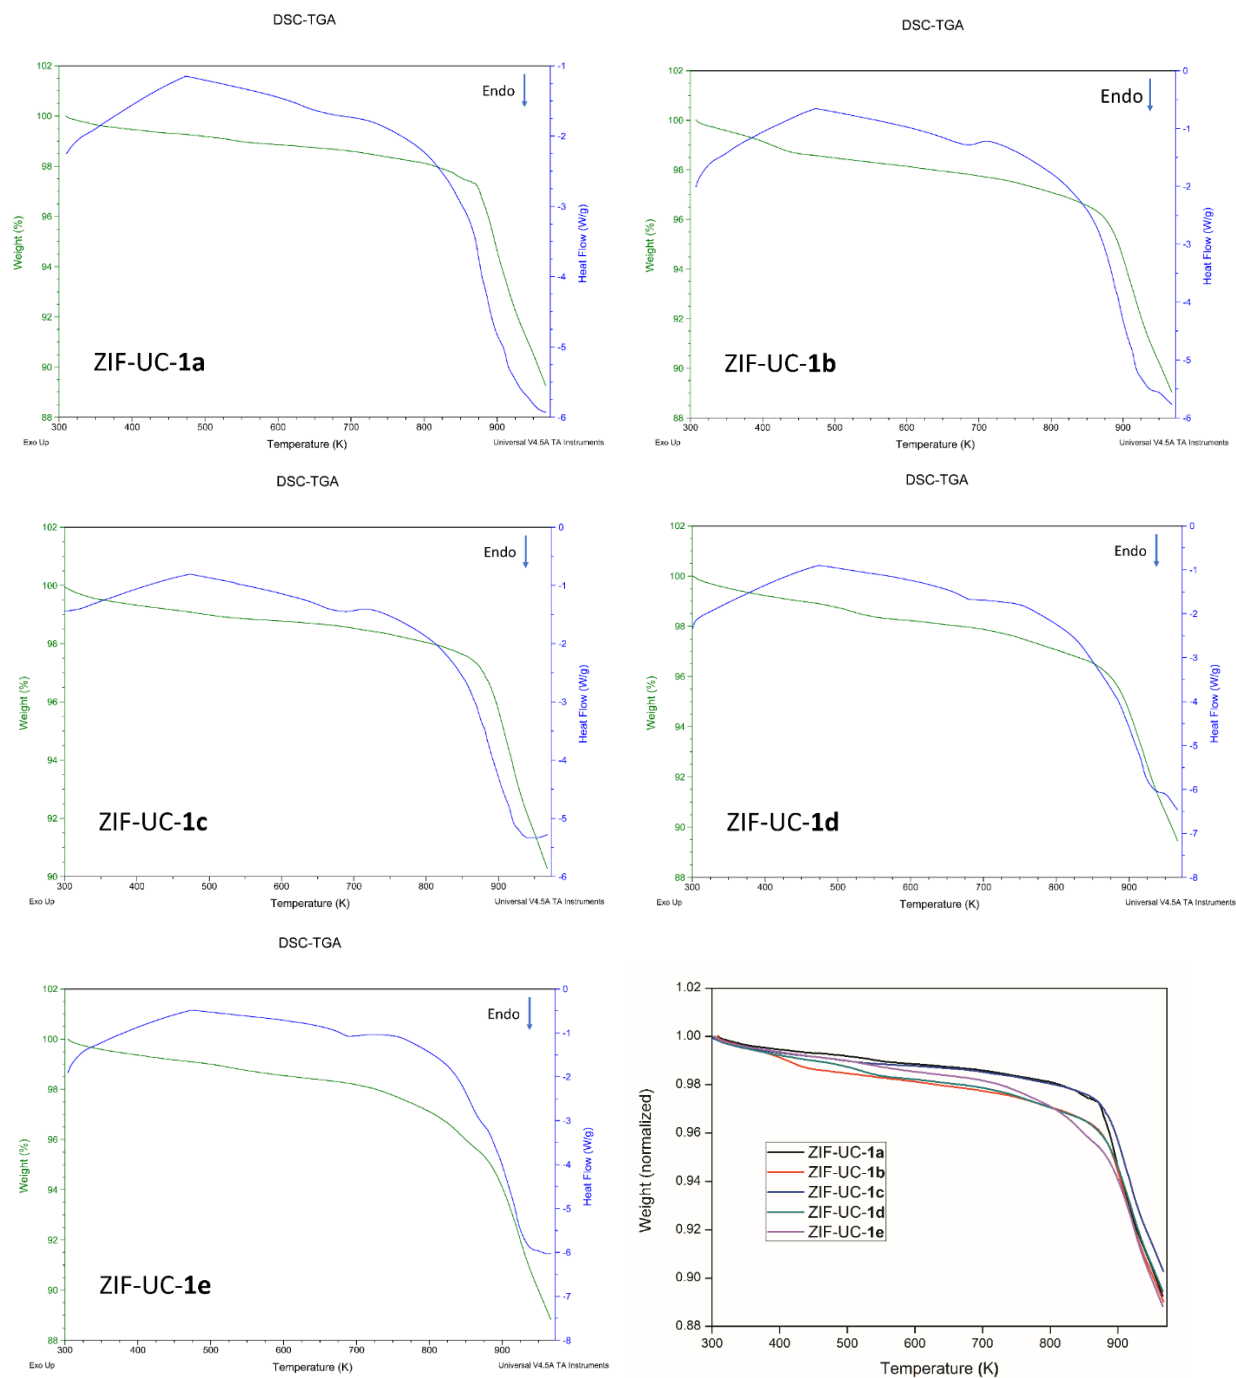

Figure S12. SDT and TGA data.

## 8. Bulk glass formation

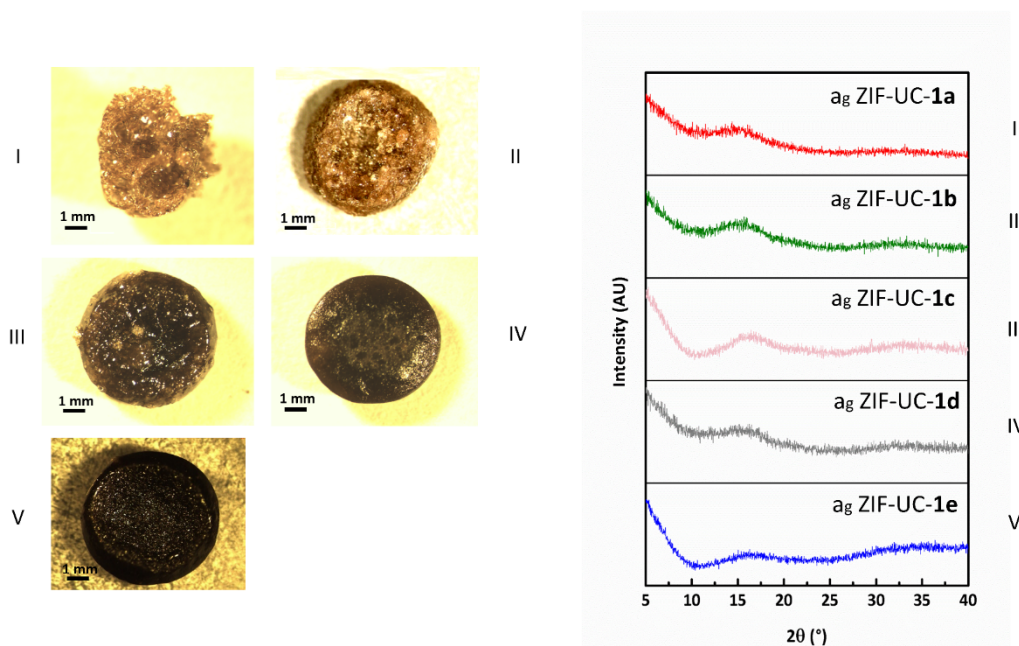

**Figure S13.** X-ray diffraction patterns of all glass samples with corresponding pictures of the obtained glasses. The colour of the final glass depends of the amount of mbIm and may indicate partial demethylation upon melting.

## References

- 1 R. Banerjee, A. Phan, B. Wang, C. Knobler, H. Furukawa, M. O’Keeffe and O. M. Yaghi, *Science*, 2008, **319**, 939–943.
- 2 L. Palatinus and G. Chapuis, *J. Appl. Crystallogr.*, 2007, **40**, 786–790.
